# Supplementary material for: Characterization of glycosphingolipid epimers by radical-directed dissociation mass spectrometry
Source: Royal Society of Chemistry journal article supplement (doi:10.1039/c5an02383a), 2016-01-01
Supplement: c5an02383a1.pdf [file c5an02383a1.pdf]

## **SUPPLEMENTARY MATERIAL**

*for*

### **Characterization of Glycosphingolipid Epimers by Radical-Directed Dissociation Mass Spectrometry**

Huong T. Pham and Ryan R. Julian\*

*Department of Chemistry, University of California, Riverside*

\* Corresponding Author: [ryan.julian@ucr.edu](mailto:ryan.julian@ucr.edu)

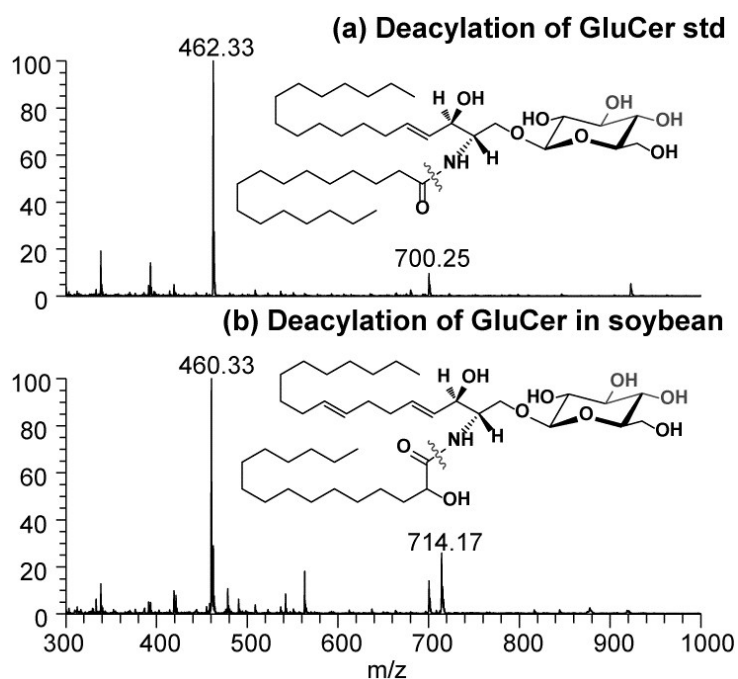

**Figure S-1.** Full mass spectra acquired from deacylation reaction of (a) GluCer synthetic standard and (b) GluCer in soybean. Structures of the initial GSL are inserted with the likely side of bond cleavage in the associated condition (i.e. KOH 0.01 M, pH 12).

**Scheme S-1.** Proposed mechanism for some characteristic RDD product ions generated from soy [GluSph]<sup>++</sup> m/z 459.

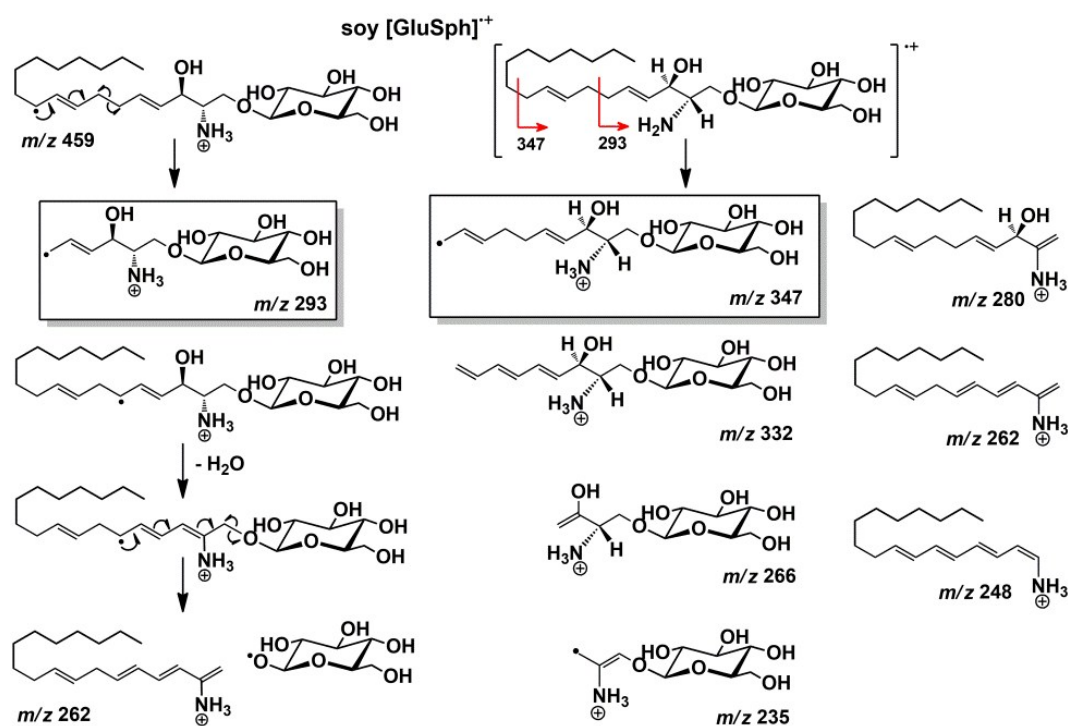

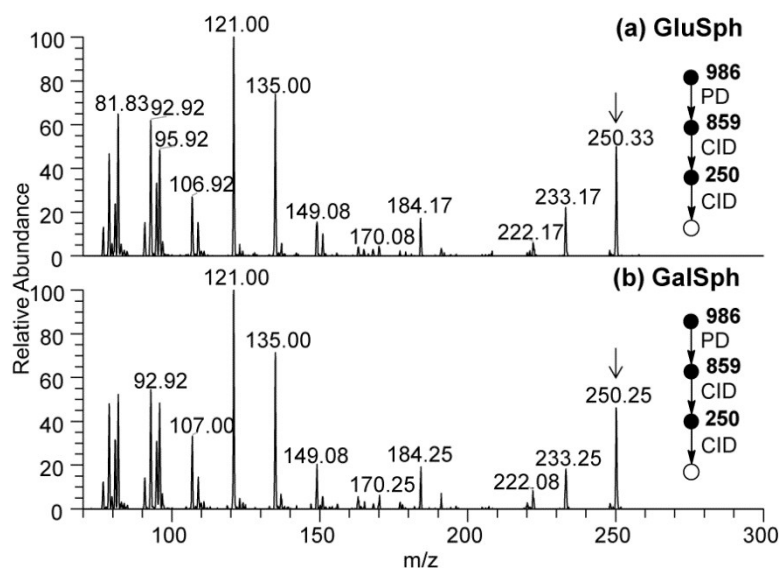

**Figure S-2.** MS<sup>4</sup> acquired on  $m/z$  250 product ion generated in PD/CID of the noncovalent complexes (a) [GluSph+H+IB18C6]<sup>+</sup> and (b) [GalSph+H+IB18C6]<sup>+</sup>, respectively.

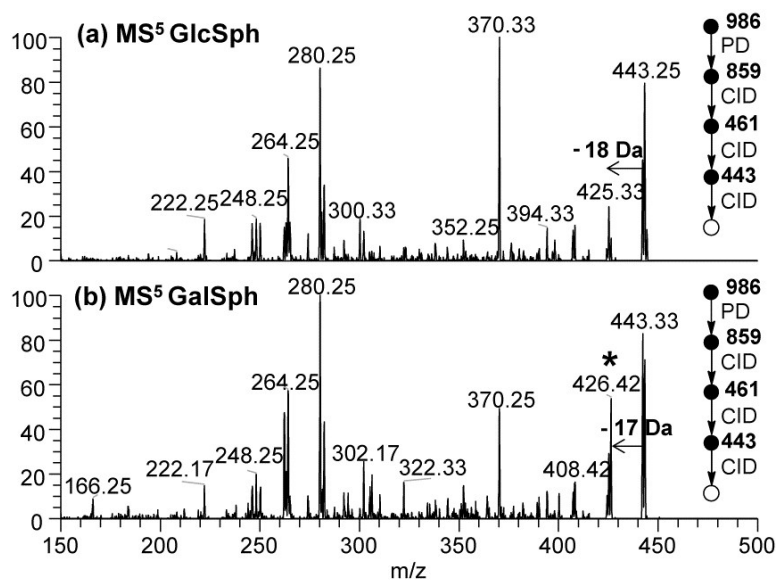

**Figure S-3.** MS<sup>5</sup> acquired on  $m/z$  443 product ion generated in RDD spectra from (a) [GluSph]<sup>++</sup> and (b) [GalSph]<sup>++</sup>, respectively.

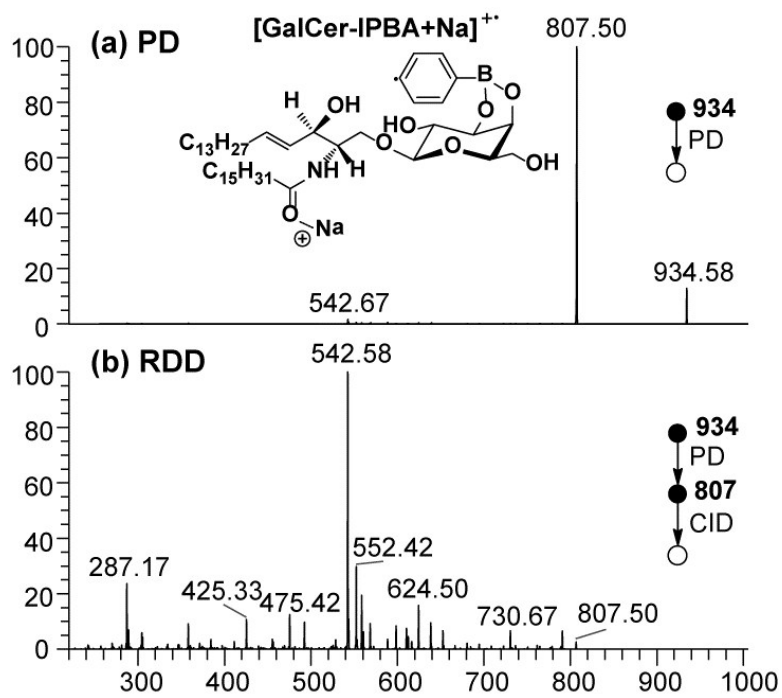

**Figure S-4.** (a) PD spectrum and (d) RDD spectrum obtained from  $[\text{GalCer-IPBA+Na}]^{+}$  precursor ion resulted from addition of IPBA and NaOAc to the solution of GalCer.
